# Supplementary material
Source: PubMed Central journal article supplement (PMC6980270)
Supplement: NIHMS1053958-supplement-1.pdf [file NIHMS1053958-supplement-1.pdf]

Supplemental Table 1: Exposure to cannabis marketing by platform and demographic characteristics

|                       | Cannabis marketing exposure |      |                  |      |                  |      | p-value      |                                        | Cannabis marketing exposure |      |                  |      |                  |              | p-value |
|-----------------------|-----------------------------|------|------------------|------|------------------|------|--------------|----------------------------------------|-----------------------------|------|------------------|------|------------------|--------------|---------|
|                       | No                          |      | Yes              |      | total            |      |              |                                        | No                          |      | Yes              |      | total            |              |         |
|                       | n                           | %    | n                | %    | n                | %    |              | n                                      | %                           | n    | %                | n    | %                |              |         |
| <b>Facebook:</b>      | <b>(n = 196)</b>            |      | <b>(n = 273)</b> |      | <b>(n = 469)</b> |      |              | <b>Newspapers/ Magazines:</b>          | <b>(n = 267)</b>            |      | <b>(n = 202)</b> |      | <b>(n = 469)</b> |              |         |
| <b>Age</b>            |                             |      |                  |      |                  |      | <b>0.001</b> | <b>Age</b>                             |                             |      |                  |      |                  | <b>0.081</b> |         |
| 15-16 years           | 115                         | 58.7 | 118              | 43.2 | 233              | 49.7 |              | 15-16 years                            | 142                         | 53.2 | 91               | 45.0 | 233              | 49.7         |         |
| 17-19 years           | 81                          | 41.3 | 155              | 56.8 | 236              | 50.3 |              | 17-19 years                            | 125                         | 46.8 | 111              | 55.0 | 236              | 50.3         |         |
| <b>Gender</b>         |                             |      |                  |      |                  |      | <b>0.918</b> | <b>Gender</b>                          |                             |      |                  |      |                  | <b>0.850</b> |         |
| Female                | 139                         | 70.9 | 190              | 69.6 | 329              | 70.1 |              | Female                                 | 188                         | 70.4 | 141              | 69.8 | 329              | 70.1         |         |
| Male                  | 51                          | 26.0 | 73               | 26.7 | 124              | 26.4 |              | Male                                   | 71                          | 26.6 | 53               | 26.2 | 124              | 26.4         |         |
| Other                 | 6                           | 3.1  | 10               | 3.7  | 16               | 3.4  |              | Other                                  | 8                           | 3.0  | 8                | 4.0  | 16               | 3.4          |         |
| <b>Race/Ethnicity</b> |                             |      |                  |      |                  |      | <b>0.590</b> | <b>Race/Ethnicity</b>                  |                             |      |                  |      |                  | <b>0.527</b> |         |
| White                 | 67                          | 34.2 | 103              | 37.7 | 170              | 36.2 |              | White                                  | 104                         | 39.0 | 66               | 32.7 | 170              | 36.2         |         |
| Black                 | 12                          | 6.1  | 19               | 7.0  | 31               | 6.6  |              | Black                                  | 18                          | 6.7  | 13               | 6.4  | 31               | 6.6          |         |
| Hispanic/ Latino      | 77                          | 39.3 | 108              | 39.6 | 185              | 39.4 |              | Hispanic/ Latino                       | 99                          | 37.1 | 86               | 42.6 | 185              | 39.4         |         |
| Other                 | 40                          | 20.4 | 43               | 15.8 | 83               | 17.7 |              | Other                                  | 46                          | 17.2 | 37               | 18.3 | 83               | 17.7         |         |
| <b>Twitter:</b>       | <b>(n = 279)</b>            |      | <b>(n = 190)</b> |      | <b>(n = 469)</b> |      |              | <b>Outdoors (i.e. billboards)</b>      | <b>(n = 127)</b>            |      | <b>(n = 342)</b> |      | <b>(n = 469)</b> |              |         |
| <b>Age</b>            |                             |      |                  |      |                  |      | <b>0.032</b> | <b>Age</b>                             |                             |      |                  |      |                  | <b>0.064</b> |         |
| 15-16 years           | 150                         | 53.8 | 83               | 43.7 | 233              | 49.7 |              | 15-16 years                            | 72                          | 56.7 | 161              | 47.1 | 233              | 49.7         |         |
| 17-19 years           | 129                         | 46.2 | 107              | 56.3 | 236              | 50.3 |              | 17-19 years                            | 55                          | 43.3 | 181              | 52.9 | 236              | 50.3         |         |
| <b>Gender</b>         |                             |      |                  |      |                  |      | <b>0.742</b> | <b>Gender</b>                          |                             |      |                  |      |                  | <b>0.920</b> |         |
| Female                | 195                         | 69.9 | 134              | 70.5 | 329              | 70.1 |              | Female                                 | 88                          | 69.3 | 241              | 70.5 | 329              | 70.1         |         |
| Male                  | 73                          | 26.2 | 51               | 26.8 | 124              | 26.4 |              | Male                                   | 34                          | 26.8 | 90               | 26.3 | 124              | 26.4         |         |
| Other                 | 11                          | 3.9  | 5                | 2.6  | 16               | 3.4  |              | Other                                  | 5                           | 3.9  | 11               | 3.2  | 16               | 3.4          |         |
| <b>Race/Ethnicity</b> |                             |      |                  |      |                  |      | <b>0.614</b> | <b>Race/Ethnicity</b>                  |                             |      |                  |      |                  | <b>0.109</b> |         |
| White                 | 104                         | 37.3 | 66               | 34.7 | 170              | 36.2 |              | White                                  | 39                          | 30.7 | 131              | 38.3 | 170              | 36.2         |         |
| Black                 | 15                          | 5.4  | 16               | 8.4  | 31               | 6.6  |              | Black                                  | 5                           | 3.9  | 26               | 7.6  | 31               | 6.6          |         |
| Hispanic/ Latino      | 110                         | 39.4 | 75               | 39.5 | 185              | 39.4 |              | Hispanic/ Latino                       | 60                          | 47.2 | 125              | 36.5 | 185              | 39.4         |         |
| Other                 | 50                          | 17.9 | 33               | 17.4 | 83               | 17.7 |              | Other                                  | 23                          | 18.1 | 60               | 17.5 | 83               | 17.7         |         |
| <b>Instagram:</b>     | <b>(n = 171)</b>            |      | <b>(n = 298)</b> |      | <b>(n = 469)</b> |      |              |                                        |                             |      |                  |      |                  |              |         |
| <b>Age</b>            |                             |      |                  |      |                  |      | <b>0.993</b> | Note: p-values from chi-squared tests. |                             |      |                  |      |                  |              |         |
| 15-16 years           | 85                          | 49.7 | 148              | 49.7 | 233              | 49.7 |              |                                        |                             |      |                  |      |                  |              |         |
| 17-19 years           | 86                          | 50.3 | 150              | 50.3 | 236              | 50.3 |              |                                        |                             |      |                  |      |                  |              |         |
| <b>Gender</b>         |                             |      |                  |      |                  |      | <b>0.325</b> |                                        |                             |      |                  |      |                  |              |         |
| Female                | 113                         | 66.1 | 216              | 72.5 | 329              | 70.1 |              |                                        |                             |      |                  |      |                  |              |         |
| Male                  | 52                          | 30.4 | 72               | 24.2 | 124              | 26.4 |              |                                        |                             |      |                  |      |                  |              |         |
| Other                 | 6                           | 3.5  | 10               | 3.4  | 16               | 3.4  |              |                                        |                             |      |                  |      |                  |              |         |
| <b>Race/Ethnicity</b> |                             |      |                  |      |                  |      | <b>0.027</b> |                                        |                             |      |                  |      |                  |              |         |
| White                 | 63                          | 36.8 | 107              | 35.9 | 170              | 36.2 |              |                                        |                             |      |                  |      |                  |              |         |
| Black                 | 4                           | 2.3  | 27               | 9.1  | 31               | 6.6  |              |                                        |                             |      |                  |      |                  |              |         |
| Hispanic/ Latino      | 68                          | 39.8 | 117              | 39.3 | 185              | 39.4 |              |                                        |                             |      |                  |      |                  |              |         |
| Other                 | 36                          | 21.1 | 47               | 15.8 | 83               | 17.7 |              |                                        |                             |      |                  |      |                  |              |         |
