# Supplementary material
Source: PubMed Central journal article supplement (PMC6980270)
Supplement: NIHMS1053958-supplement-2.pdf [file NIHMS1053958-supplement-2.pdf]

Supplemental Table 2: Multivariable associations between exposure to cannabis marketing via traditional media and past year cannabis use

|                                                  | Newspaper or magazines |                         |                  | Outdoor      |                         |                  |
|--------------------------------------------------|------------------------|-------------------------|------------------|--------------|-------------------------|------------------|
|                                                  | OR                     | 95% CI                  | p-value          | OR           | 95% CI                  | p-value          |
| Exposure to marketing in newspapers or magazines |                        |                         |                  |              |                         |                  |
| No (reference group)                             |                        |                         |                  |              |                         |                  |
| Yes                                              | 1.47                   | (0.87 - 2.48)           | 0.147            |              |                         |                  |
| Exposure to outdoor marketing                    |                        |                         |                  |              |                         |                  |
| No (reference group)                             |                        |                         |                  |              |                         |                  |
| Yes                                              |                        |                         |                  | 1.53         | (0.88 - 2.65)           | 0.131            |
| Age category                                     |                        |                         |                  |              |                         |                  |
| mid-adolescence (reference group)                |                        |                         |                  |              |                         |                  |
| older adolescence                                | 0.78                   | (0.44 - 1.37)           | 0.387            | 0.75         | (0.42 - 1.33)           | 0.324            |
| gender                                           |                        |                         |                  |              |                         |                  |
| female (reference group)                         |                        |                         |                  |              |                         |                  |
| male                                             | 1.29                   | (0.70 - 2.38)           | 0.416            | 1.24         | (0.67 - 2.31)           | 0.488            |
| other                                            | 1.23                   | (0.36 - 4.25)           | 0.740            | 1.18         | (0.32 - 4.31)           | 0.803            |
| Race/ethnicity                                   |                        |                         |                  |              |                         |                  |
| White (reference group)                          |                        |                         |                  |              |                         |                  |
| Black                                            | 1.37                   | (0.34 - 5.45)           | 0.657            | 1.34         | (0.33 - 5.41)           | 0.679            |
| Hispanic/Latino                                  | 0.83                   | (0.47 - 1.46)           | 0.511            | 0.86         | (0.48 - 1.53)           | 0.607            |
| Other                                            | 0.54                   | (0.25 - 1.15)           | 0.109            | 0.55         | (0.26 - 1.18)           | 0.127            |
| Parent education                                 |                        |                         |                  |              |                         |                  |
| Less than high school (reference group)          |                        |                         |                  |              |                         |                  |
| <b>HS or GED</b>                                 | <b>2.24</b>            | <b>(1.13 - 4.45)</b>    | <b>0.021</b>     | <b>2.27</b>  | <b>(1.14 - 4.53)</b>    | <b>0.019</b>     |
| Completed some college or more                   | 1.65                   | (0.82 - 3.32)           | 0.159            | 1.62         | (0.81 - 3.27)           | 0.175            |
| Theory of normative social behavior              |                        |                         |                  |              |                         |                  |
| injunctive norms                                 | <b>1.78</b>            | <b>(1.42 - 2.23)</b>    | <b>&lt;0.001</b> | <b>1.76</b>  | <b>(1.41 - 2.21)</b>    | <b>&lt;0.001</b> |
| outcome expectancies score                       | <b>59.31</b>           | <b>(13.28 - 264.98)</b> | <b>&lt;0.001</b> | <b>57.01</b> | <b>(12.50 - 260.07)</b> | <b>&lt;0.001</b> |
| gender X outcome expectancies                    | <b>0.26</b>            | <b>(0.11 - 0.61)</b>    | <b>0.002</b>     | <b>0.27</b>  | <b>(0.11 - 0.63)</b>    | <b>0.003</b>     |

AOR adjusted odds ratio; CI confidence interval; GED general educational development

Bold indicates that p-value<0.05
